# Supplementary material for: Friends, followers, peers, and posts: adolescents' in-person and online friendship networks and social media use influences on friendship closeness via the importance of technology for social connection
Source: Frontiers journal article supplement (doi:10.3389/fdpys.2024.1419756), 2024-07-24
Supplement: Table_1.DOCX [file Table_1.DOCX]

| **Table 1** | | | |
| --- | --- | --- | --- |
| ***Density and Reciprocity Values*** | | | |
| Network | | Density | Edgewise Reciprocity |
| Grade 8 A | In person | 0.21 | 0.53 |
| Online | 0.14 | 0.44 |
| Grade 8 B | In person | 0.30 | 0.36 |
| Online | 0.36 | 0.45 |
| Grade 8 C | In person | 0.13 | 0.55 |
| Online | 0.10 | 0.32 |
| Grade 8 D | In person | 0.11 | 0.44 |
| Online | 0.11 | 0.27 |
| Grade 8 E | In person | 0.21 | 0.55 |
| Online | 0.27 | 0.62 |
| Grade 9 | In person | 0.02 | 0.44 |
| Online | 0.02 | 0.38 |
| Grade 10 | In person | 0.02 | 0.34 |
| Online | 0.02 | 0.18 |
| Grade 11 | In person | 0.02 | 0.41 |
| Online | 0.02 | 0.28 |
| Grade 12 | In person | 0.02 | 0.30 |

| **Table 2** | | |
| --- | --- | --- |
| ***Values for QAP Test Results (1000 reps.)*** | | |
| Network | *n* | Test Value |
| Grade 8 A | 23 | .69 |
| Grade 8 B | 12 | .54 |
| Grade 8 C | 39 | .46 |
| Grade 8 D | 22 | .44 |
| Grade 8 E | 20 | .43 |
| Grade 9 | 154 | .56 |
| Grade 10 | 152 | .50 |
| Grade 11 | 133 | .43 |
| Grade 12 | 130 | .61 |

*Note.* Estimated p-values: p(f(perm) >= f(d)): 0, p(f(perm) <= f(d)): 1
